# Supplementary material
Source: ML conference proceedings conference paper supplement (https://openreview.net/forum?id=cgiOX8lfwG)
Supplement: supplementary_material [file attachment]

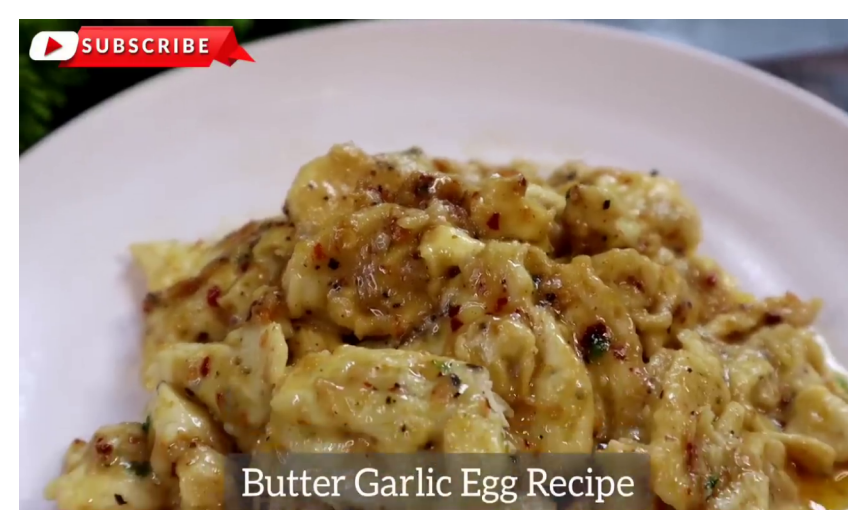

Butter Garlic Egg Recipe

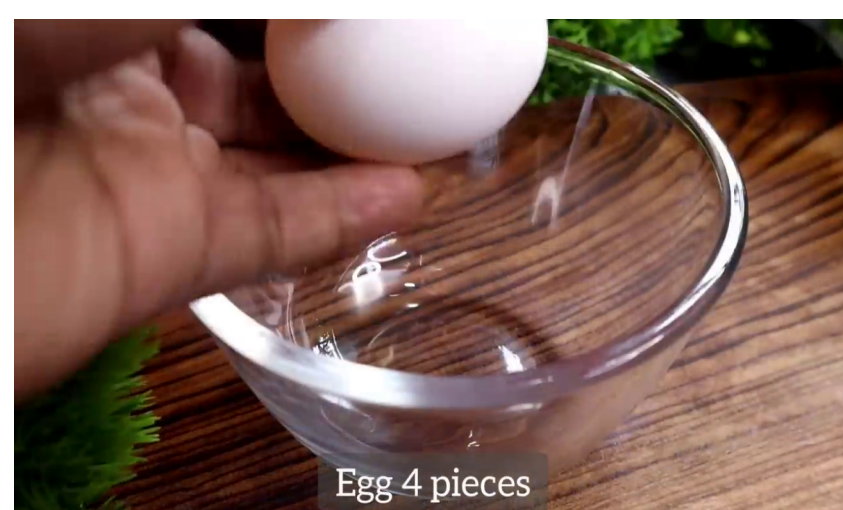

Egg 4 pieces

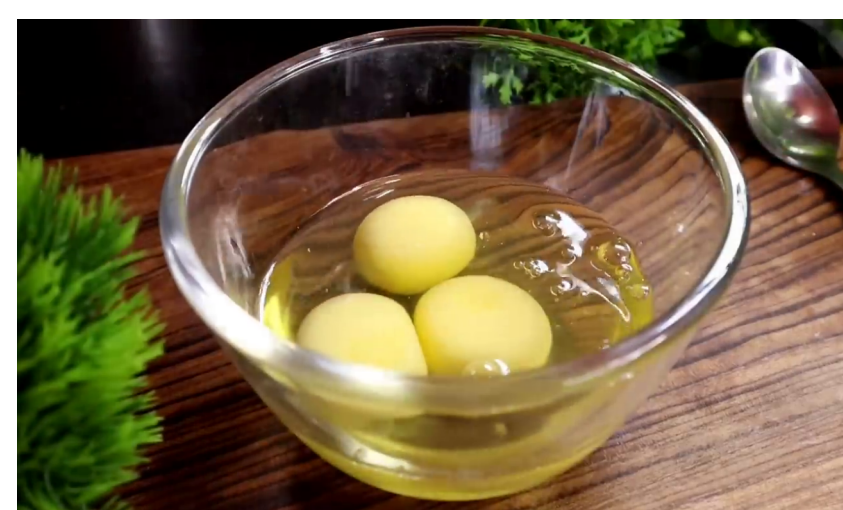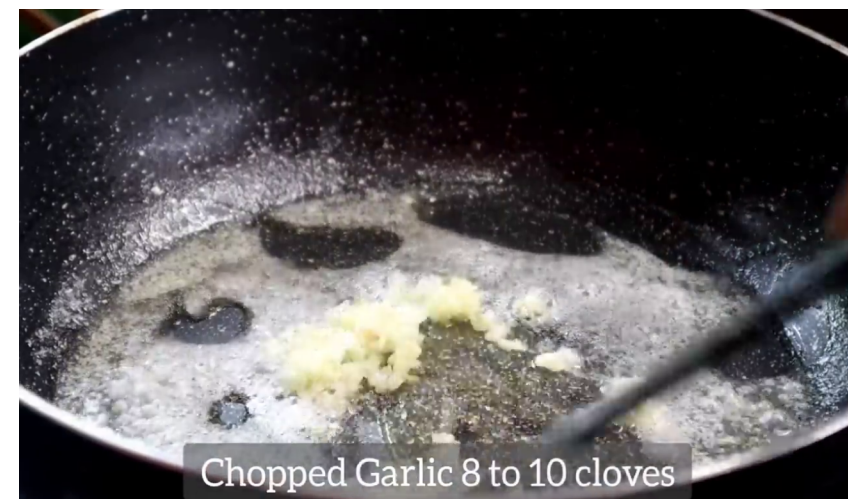

Chopped Garlic 8 to 10 cloves

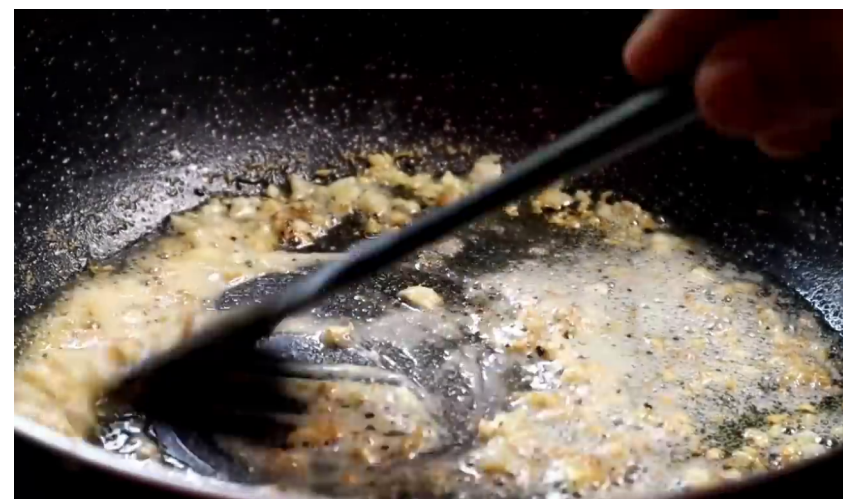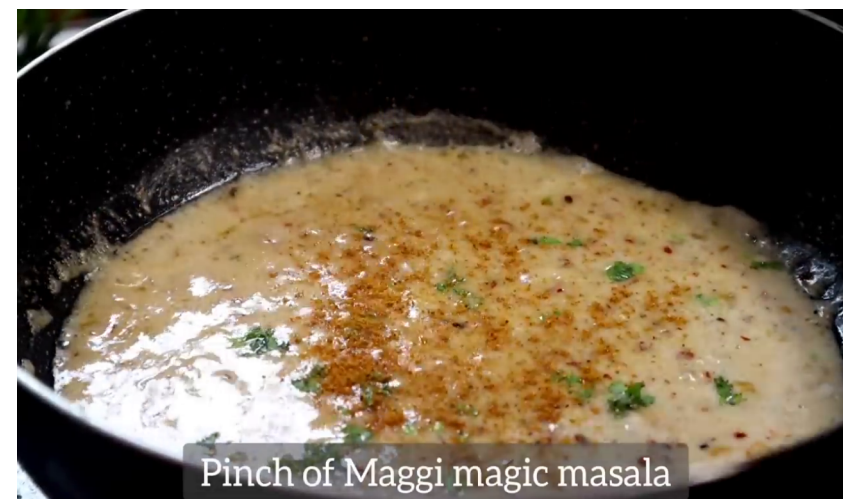

Pinch of Maggi magic masala

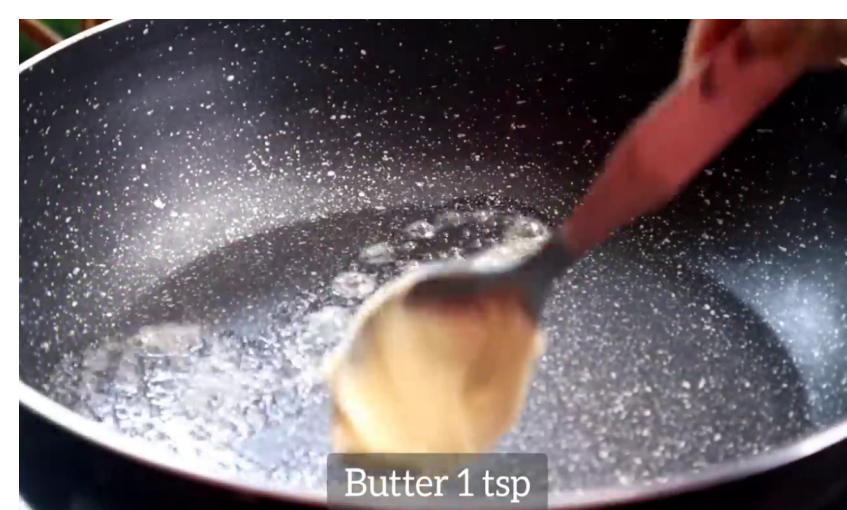

Butter 1 tsp

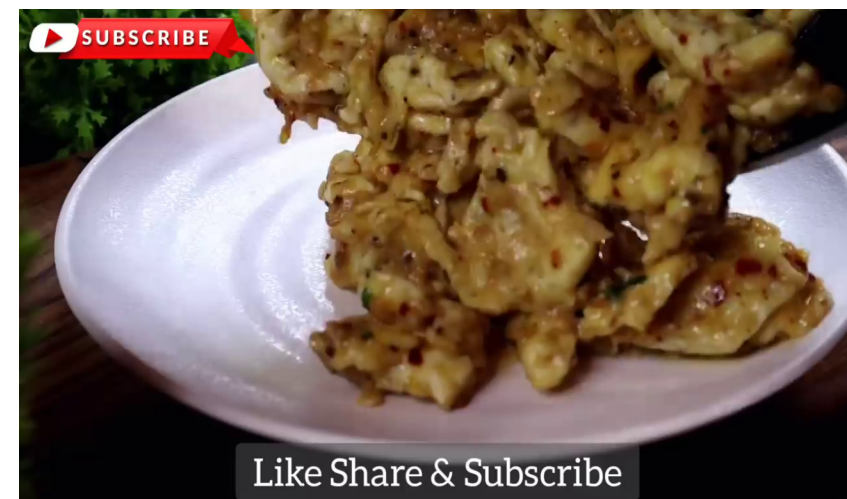

Like Share & Subscribe
